# Supplementary material
Source: MDPI journal article supplement (https://www.mdpi.com/2311-7524/9/6/712)
Supplement: s1 [file s1]

**Table S1.** Summary of basic characteristics of phages from published studies focused on the use of bacteriophages as biocontrol agents against *Pseudomonas syringae* over the last 50 years.

| Target pathogen                                                                                     | Phage names*                                                        | Phages family                              | Other information                                                                                                                                                                                                                                                                                                                        | Reference |
|-----------------------------------------------------------------------------------------------------|---------------------------------------------------------------------|--------------------------------------------|------------------------------------------------------------------------------------------------------------------------------------------------------------------------------------------------------------------------------------------------------------------------------------------------------------------------------------------|-----------|
| <i>Pseudomonas syringae</i><br><b>pv. actinidiae</b>                                                | φPSA2                                                               | <i>Podoviridae</i>                         |                                                                                                                                                                                                                                                                                                                                          | 203       |
| <i>Pseudomonas syringae</i><br><b>pv. syringae</b>                                                  | SoKa                                                                | <i>Autographiviridae</i>                   | The presence of the phage is capable of significantly inhibiting the formation of biofilms of <i>Pss</i> KB49, KC19 and KC82, except for the KC46 strain.                                                                                                                                                                                | 204       |
| <i>Pseudomonas syringae</i><br><b>pv. actinidiae</b>                                                | Hairong and ZY21                                                    | Not informed                               |                                                                                                                                                                                                                                                                                                                                          | 205       |
| <i>Pseudomonas syringae</i><br><b>pv. tomato</b>                                                    | Eir4 and Eisa9                                                      | <i>Autographiviridae</i>                   |                                                                                                                                                                                                                                                                                                                                          | 206       |
| <i>Pseudomonas syringae</i><br><b>pv. actinidiae</b>                                                | PKb2b, PKb5a, PHR10a, and PHB10b                                    | <i>Siphoviridae</i> and <i>Podoviridae</i> |                                                                                                                                                                                                                                                                                                                                          | 207       |
| <i>Pseudomonas syringae</i><br><b>pv. syringae</b>                                                  | Pf-10                                                               | <i>Autographiviridae</i>                   | It is the first of five bacteriophages called "Multiphage" to be sequenced and characterized.                                                                                                                                                                                                                                            | 208       |
| <i>Pseudomonas syringae</i><br><b>pv. actinidiae</b>                                                | PHB09                                                               | Not informed                               | Phylogenetic analysis of the phage sequence determined that PHB09 belongs to a new genus in the Caudoviricete class.                                                                                                                                                                                                                     | 209       |
| <i>Pseudomonas syringae</i><br><b>pv. actinidiae</b> and <i>P. syringae</i> <b>pv. phaseolicola</b> | Psage A1, Psage B1, PsageK4 and Psage B2 for Psa while pφB1 for Pph | <i>Autographiviridae</i>                   | 32 phages isolated (5 selected for further characterization). The phages maintained their stability even when they were exposed to stress conditions to determine their behavior in open field conditions.                                                                                                                               | 210       |
| <i>Pseudomonas syringae</i><br><b>pv. syringae</b>                                                  | F911, F922, F943, F954, F1215, F1226, F137, F358, and F369          | Not informed                               | Nine phages isolated (5 selected for further characterization). In 2014 and 2015, soil samples (approximately 30-cm deep) for isolation of bacteriophages specific for <i>P. syringae</i> pathovars were collected from sweet cherry orchards with symptoms of bacterial canker in 17 locations in Izmir and Manisa provinces in Turkey. | 211       |
| <i>Pseudomonas syringae</i><br><b>pv. actinidiae</b>                                                | PN09                                                                | <i>Myoviridae</i>                          | The lytic bacteriophage PN09 of Psa was isolated from surface water collected from a river in Hangzhou, China in 2019. Also,                                                                                                                                                                                                             | 194       |

|                                                                                                                       |                                                                                                                   |                                                                      |                                                                                                                                                                                                                                                                                                                                                                                                                                                                                                    |     |
|-----------------------------------------------------------------------------------------------------------------------|-------------------------------------------------------------------------------------------------------------------|----------------------------------------------------------------------|----------------------------------------------------------------------------------------------------------------------------------------------------------------------------------------------------------------------------------------------------------------------------------------------------------------------------------------------------------------------------------------------------------------------------------------------------------------------------------------------------|-----|
|                                                                                                                       |                                                                                                                   |                                                                      | characterization of phage endolysin was performed.                                                                                                                                                                                                                                                                                                                                                                                                                                                 |     |
| <i>Pseudomonas syringae</i><br><b>pv. actinidiae</b>                                                                  | PPPL-1                                                                                                            | <i>Podoviridae</i>                                                   | PPPL-1 could successfully kill streptomycin-resistant Psa isolates. Also, phage was stable in the field soil and at low temperature of $0 \pm 2^{\circ}\text{C}$ .                                                                                                                                                                                                                                                                                                                                 | 201 |
| <i>Pseudomonas syringae</i><br><b>pv. syringae</b>                                                                    | <i>Pseudomonas</i><br>phage<br>vB_PsyS_Phobos                                                                     | <i>Siphoviridae</i>                                                  |                                                                                                                                                                                                                                                                                                                                                                                                                                                                                                    | 26  |
| <i>Pseudomonas syringae</i><br><b>pv. porri</b>                                                                       | KIL3b and KIL5                                                                                                    | <i>Myoviridae</i>                                                    |                                                                                                                                                                                                                                                                                                                                                                                                                                                                                                    | 212 |
| <i>Pseudomonas syringae</i><br><b>pv. aesculi</b>                                                                     | 2KS, RC8CS,<br>RC5CS and<br>1CKS                                                                                  | <i>Myoviridae</i> and<br><i>Podoviridae</i>                          | 22 phages isolated (4 selected for further characterization)                                                                                                                                                                                                                                                                                                                                                                                                                                       | 22  |
| <i>Pseudomonas syringae</i><br><b>spp.</b>                                                                            | <i>Pseudomonas</i><br>phage Bertil,<br><i>Pseudomonas</i><br>phage Misse and<br><i>Pseudomonas</i><br>phage Strit | Similar to<br><i>Autographiviridae</i>                               | The isolated phages shared some characteristics with <i>Autographiviridae</i> family, they could constitute a novel genus. This study is the first report of phages against GAW0113 strain.                                                                                                                                                                                                                                                                                                        | 213 |
| <i>Pseudomonas syringae</i><br><b>pv. actinidiae</b>                                                                  | PN05 and PN09                                                                                                     | <i>Myoviridae</i>                                                    |                                                                                                                                                                                                                                                                                                                                                                                                                                                                                                    | 194 |
| <i>Pseudomonas syringae</i><br><b>pv. actinidiae</b>                                                                  | $\phi 6$ (a<br>commercially<br>available phage)                                                                   | <i>Cystoviridae</i>                                                  |                                                                                                                                                                                                                                                                                                                                                                                                                                                                                                    | 202 |
| <i>Pseudomonas syringae</i><br><b>pv. syringae</b> and <i>P.</i><br><i>syringae</i> <b>pv.</b><br><i>morsprunorum</i> | MR1, MR2,<br>MR4, MR5,<br>MR6, MR7,<br>MR8, MR12,<br>MR13, MR14,<br>MR15, MR16<br>and MR18                        | <i>Myoviridae</i> ,<br><i>Podoviridae</i> and<br><i>Siphoviridae</i> | 70 phages isolated (13 selected for further characterization)                                                                                                                                                                                                                                                                                                                                                                                                                                      | 136 |
| <i>Pseudomonas syringae</i><br><b>pv. actinidiae</b>                                                                  | CHF1, CHF7,<br>CHF19 and<br>CHF1                                                                                  | <i>Podoviridae</i>                                                   | 14 phages isolated (4 selected for further characterization)                                                                                                                                                                                                                                                                                                                                                                                                                                       | 27  |
| <i>Pseudomonas syringae</i><br><b>pv. syringae</b>                                                                    | $\phi 6$ (a<br>commercially<br>available phage)                                                                   | <i>Cystoviridae</i>                                                  |                                                                                                                                                                                                                                                                                                                                                                                                                                                                                                    | 80  |
| <i>Pseudomonas syringae</i><br><b>pv. actinidiae</b>                                                                  | PPPL-1                                                                                                            | <i>Podoviridae</i>                                                   | Also, PPPL-1 was effective against at least 20 more <i>P. syringae</i> pathovars, including <i>P. syringae</i> <b>pv.</b> <i>aptata</i> , <b>pv.</b> <i>atrofaciens</i> , <b>pv.</b> <i>atropurpurea</i> , <b>pv.</b> <i>berberidis</i> , <b>pv.</b> <i>ciccaronei</i> , <b>pv.</b> <i>coronafaciens</i> , <b>pv.</b> <i>dysoxyli</i> , <b>pv.</b> <i>eriobotryae</i> , <b>pv.</b> <i>helianthi</i> , <b>pv.</b> <i>japonica</i> , <b>pv.</b> <i>lapsa</i> , <b>pv.</b> <i>mellea</i> , <b>pv.</b> | 201 |

|                                                                                                          |                                                                                                                                                                                                                                                                                         |                                                                      |                                                                                                                                                                                                                                                                  |     |
|----------------------------------------------------------------------------------------------------------|-----------------------------------------------------------------------------------------------------------------------------------------------------------------------------------------------------------------------------------------------------------------------------------------|----------------------------------------------------------------------|------------------------------------------------------------------------------------------------------------------------------------------------------------------------------------------------------------------------------------------------------------------|-----|
|                                                                                                          |                                                                                                                                                                                                                                                                                         |                                                                      | <i>morsprunorum</i> , <i>pv. myricae</i> , <i>pv. panici</i> , <i>pv. phaseolicola</i> , <i>pv. pisi</i> , <i>pv. syringae</i> , <i>pv. tagetis</i> , and <i>pv. theae</i> .                                                                                     |     |
| <i>Pseudomonas syringae</i><br><b>pv. porri</b>                                                          | KIL1, KIL2,<br>KIL3, KIL4, KIL5<br>and KIL3b                                                                                                                                                                                                                                            | <i>Myoviridae</i>                                                    | Field trial experiments showed variable results. In one trial, symptom development was attenuated (reduction by 10% in symptomatic plants).                                                                                                                      | 25  |
| <i>Pseudomonas syringae</i><br><b>pv. actinidiae</b>                                                     | KHUφ34,<br>KHUφ38,<br>KHUφ44,<br>KHUφ59 and<br>KHUφ74                                                                                                                                                                                                                                   | <i>Myoviridae</i> and<br><i>Podoviridae</i>                          |                                                                                                                                                                                                                                                                  | 200 |
| <b>Different bacteria<br/>genera and species,<br/>including<br/><i>Pseudomonas syringae</i><br/>spp.</b> | PPJ1, PX1, PPJ2,<br>PEa1 and PEf1                                                                                                                                                                                                                                                       | <i>Siphoviridae</i> and<br><i>Podoviridae</i>                        | 5 phages isolated (2 selected for further characterization)                                                                                                                                                                                                      | 214 |
| <i>Pseudomonas syringae</i><br><b>pv. actinidiae</b>                                                     | φPSA1 and<br>φPSA2                                                                                                                                                                                                                                                                      | <i>Siphoviridae</i> and<br><i>Podoviridae</i>                        |                                                                                                                                                                                                                                                                  | 187 |
| <i>Pseudomonas syringae</i><br><b>pv. actinidiae</b>                                                     | φPsa1,<br>φPsa17, φPsa21,<br>φPsa173,<br>φPsa267,<br>φPsa268,<br>φPsa281,<br>φPsa292,<br>φPsa300,<br>φPsa315,<br>φPsa316,<br>φPsa317,<br>φPsa331,<br>φPsa343,<br>φPsa347,<br>φPsa374,<br>φPsa375,<br>φPsa381,<br>φPsa386,<br>φPsa393,<br>φPsa394,<br>φPsa397,<br>φPsa410 and<br>φPsa440 | <i>Myoviridae</i> ,<br><i>Podoviridae</i> and<br><i>Siphoviridae</i> | 275 phages isolated (24 selected from 258 infecting Psa). It was determined that the majority of phages have a very specific host range for <i>P. syringae</i> <i>pv. actinidiae</i> and do not affect any nonpathogenic bacteria isolated from kiwifruit plants | 24  |
| <i>Pseudomonas syringae</i><br><b>pv. tomato</b>                                                         | PT1, PT2, PT8,<br>PT10, PT11,<br>PT14, PT15,<br>PT16, PT17,                                                                                                                                                                                                                             | <i>Siphoviridae</i> and<br><i>Podoviridae</i>                        |                                                                                                                                                                                                                                                                  | 23  |

|                                                                    |                                                      |                                                                      |                                                                                                                                                                                                                                                                            |     |
|--------------------------------------------------------------------|------------------------------------------------------|----------------------------------------------------------------------|----------------------------------------------------------------------------------------------------------------------------------------------------------------------------------------------------------------------------------------------------------------------------|-----|
|                                                                    | PT18, PT19,<br>PT20, PT23,<br>PT27, PT32 and<br>PT34 |                                                                      |                                                                                                                                                                                                                                                                            |     |
| <i>Pseudomonas syringae</i><br><b>pv. glycinea</b>                 | B3-0, B3-2, B3-<br>3, B5-1, R1-1, R3-1<br>and R4-0B  | <i>Myoviridae</i> ,<br><i>Podoviridae</i> and<br><i>Siphoviridae</i> | 56 phages isolated (7 selected)                                                                                                                                                                                                                                            | 215 |
| <i>Pseudomonas syringae</i><br><b>pv. morsprunorum</b><br>(race 2) | B1                                                   | Not informed                                                         | <i>P. syringae</i> pv. <i>morsprunorum</i> c302, a<br>cherry race 2 isolate, was used for<br>isolation, purification and<br>propagation procedures. Soil from<br>beneath canker infected cherry trees<br>on East Malling Research Station<br>served as a source of phages. | 196 |

\*Phage names only of the selected phages on each study if it is the case. Abbreviations were used to describe typical bacteriophage general characterization assays, as follows: HR(n): host range (number of total tested bacterial strains). Methods of HR determination could differ between different studies; LF: lysogenization frequency; AC: adsorption curves; OSGC: one step growth curves; ST: stability tests; T: transduction assay; BR: phage resistant bacteria frequency; GS: genome sequencing; DGREA: direct genome restriction enzyme analysis; RTD: routine test dilution; TEM: transmission electron microscopy; RAPD: random amplification of polymorphic DNA by PCR; KCA: killing curves assay and RFLP: restriction fragment length polymorphism analysis.
